# Supplementary material for: Improved dehydrogenation properties of the LiNH2–LiH system by doping with alkali metal hydroxide
Source: Royal Society of Chemistry journal article supplement (doi:10.1039/c4ta03898c), 2014-10-28
Supplement: c4ta03898c1.pdf [file c4ta03898c1.pdf]

(Supplementary information)

**Improved dehydrogenation properties of the LiNH<sub>2</sub>-LiH system by doping alkali metal hydroxide**

Bao-Xia Dong, Jun Ge, Yun-Lei Teng\*, Jing-Jing Gao, Liang Song

*College of Chemistry and Chemical Engineering, Yangzhou University, Yangzhou, 225002, P. R. China.*

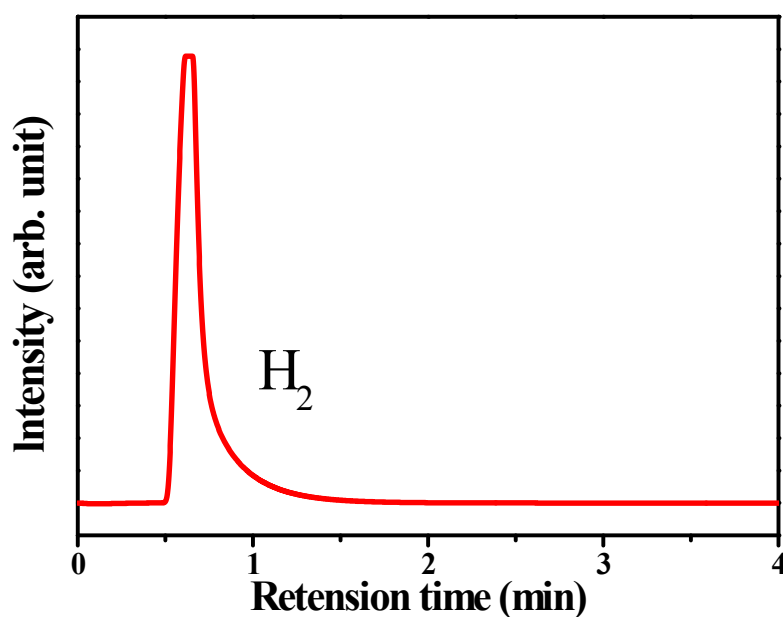

**Fig. S1** GC profiles of gas phases in the milling vessel after ball milling the 15 mol% KOH-doped LiNH<sub>2</sub>-LiH system under hydrogen atmosphere.

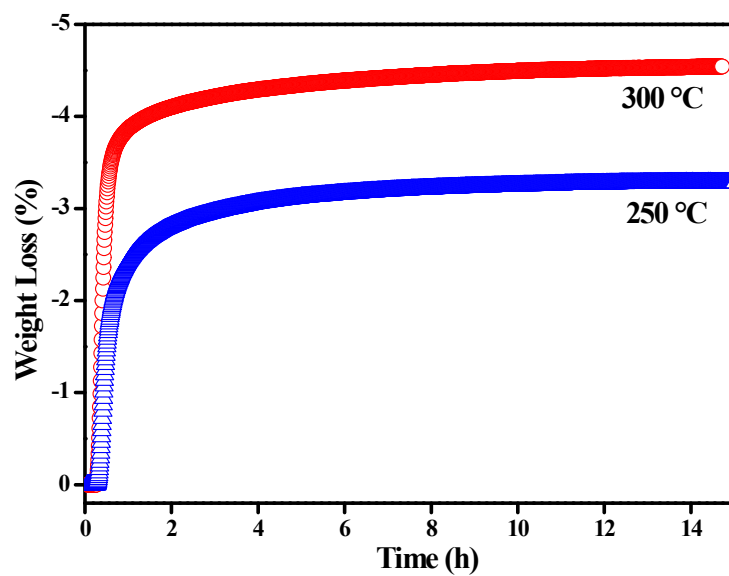

**Fig. S2** Isothermal dehydrogenation curves of the LiNH<sub>2</sub>-LiH composites at 250 °C and 300 °C.
